# Supplementary material for: Synaptically Released Matrix Metalloproteinase Activity in Control of Structural Plasticity and the Cell Surface Distribution of GluA1-AMPA Receptors
Source: PubMed Central journal article supplement (PMC4031140; doi:10.1371/journal.pone.0098274), 2014-05-22
Supplement: pone.0098274.s001.pdf [file pone.0098274.s001.pdf]

**A**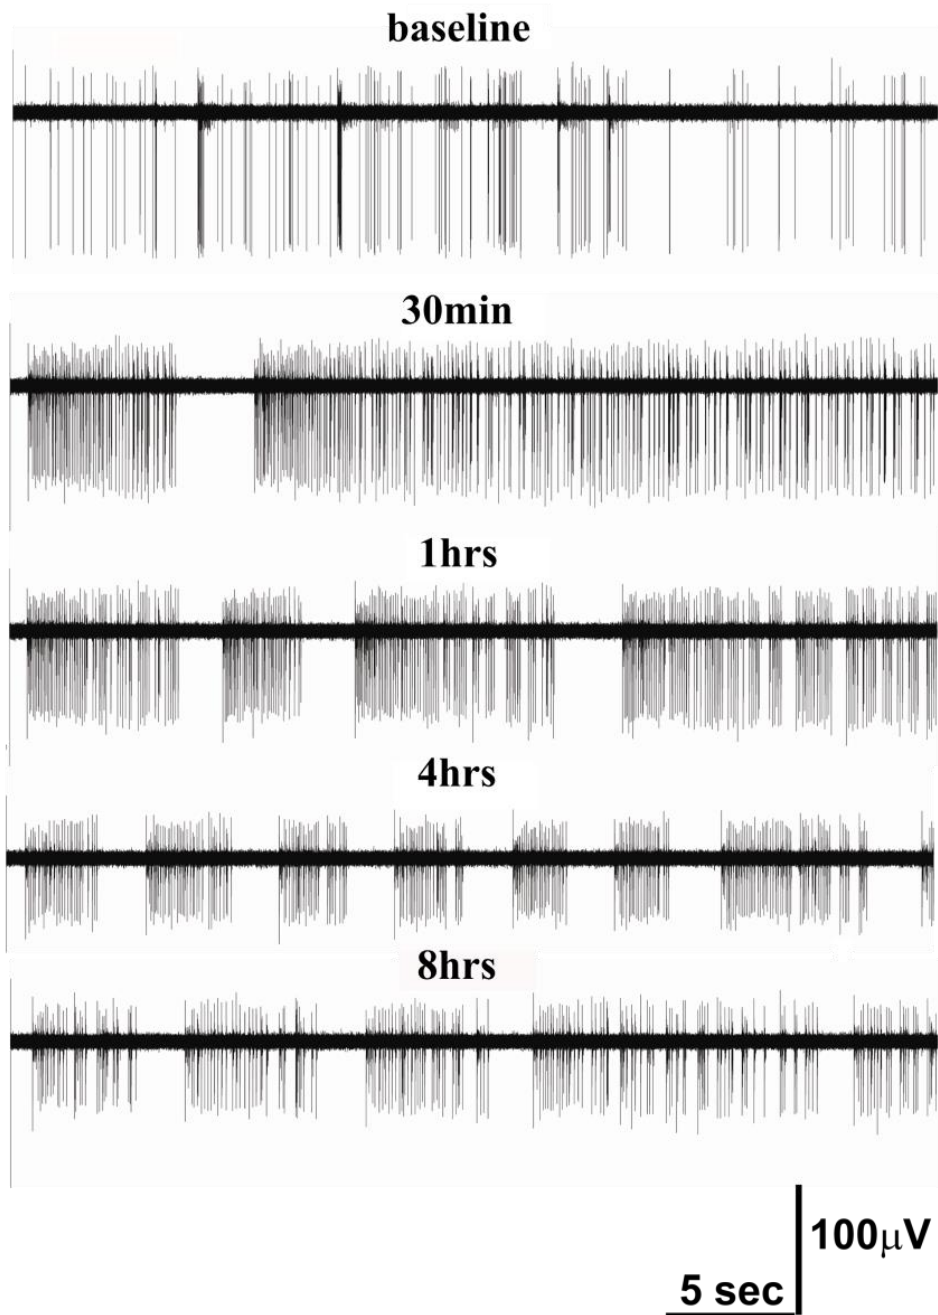**B**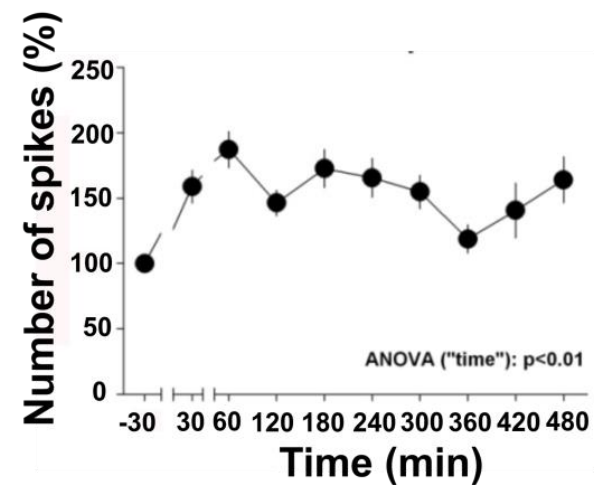**C**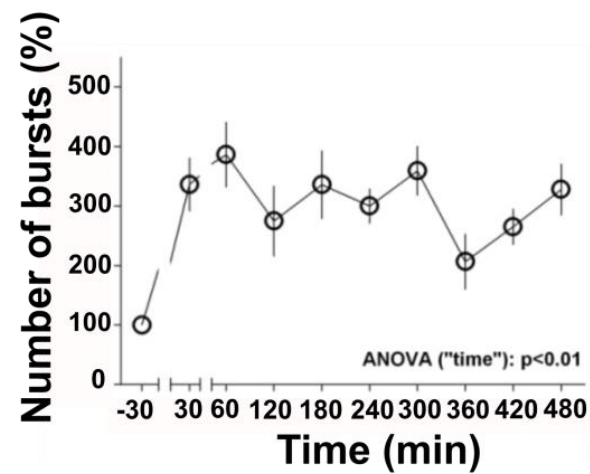**Fig. S1.**
